# Supplementary material
Source: PubMed Central journal article supplement (PMC5047086)
Supplement: supp_pp.16.00725_PP2016-00725R1_Supplemental_Figures_and_table.pdf [file supp_pp.16.00725_PP2016-00725R1_Supplemental_Figures_and_table.pdf]

1 **SUPPLEMENTAL METHODS**

2 **Functional Enrichment Analysis**

3 g:Profiler (<http://biit.cs.ut.ee/gprofiler/>) webtool was used for finding enriched GO terms in  
4 the DEGs at 1.5 hrs with Best per parent (moderate filtering) setting from g:Profiler for  
5 “Hierarchical filtering” option in order to select only the most statistically significant term  
6 from a particular hierarchical group. A score above 1.3 for negative log of adjusted p-values  
7 was considered significant.

8

9 **Motif Enrichment Analysis**

10 Webtool (<https://www.arabidopsis.org/tools/bulk/motiffinder/index.jsp>) was used for  
11 identifying motif overrepresentation (using hypergeometric test) within the 1000 bp  
12 upstream sequences (relative to Transcription Start Site) of genes.

13

14 **MapMan Photosynthesis Genes**

15 Mappings excel sheet “Ath\_AFFY\_ATH1\_TAIR10” at ([http://mapman.gabipd.org/  
16 web/quest/mapmanstore](http://mapman.gabipd.org/web/quest/mapmanstore)) was used to assign photosynthesis genes to the different  
17 categories in Supplemental Table S1.

18

19

20

21

22

23

24

25

26

27

28

29

30

31

32

33

34

35

36

37

38

39  
40  
41  
42  
43

**SUPPLEMENTAL FIGURES AND TABLES**

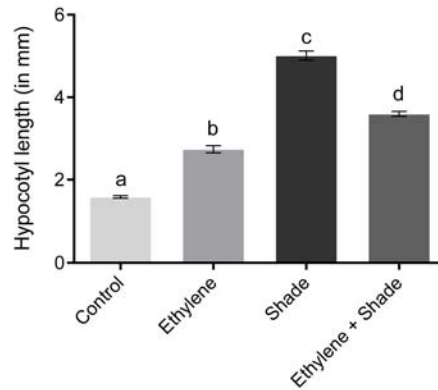

44  
45  
46  
47  
48

**Supplemental Figure S1.** Effect of 7 d control, ethylene, shade and combination (ethylene + shade) treatments on hypocotyl length of *Arabidopsis* seedlings in short day photoperiod (9 h light / 15 h dark). Data represents mean ± S.E. (n=30-50). Different letters above the bars indicate significant differences (1-way ANOVA followed by Post-Hoc pairwise comparison).

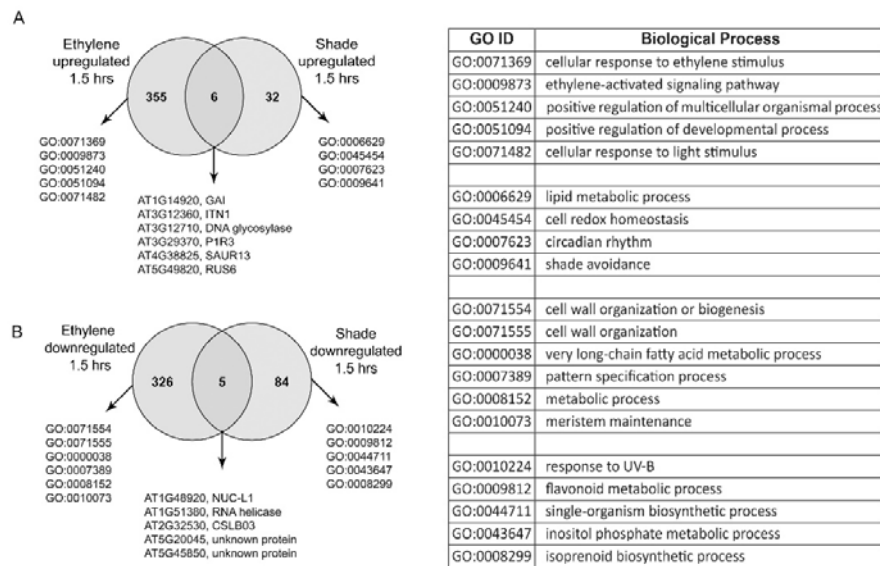

49  
50  
51  
52

**Supplemental Figure S2.** g:Profiler analysis for enriched Gene ontology (GO) IDs (adj. p-value ≤ 0.05) or genes for DEGs (A) up- or (B) down- regulated at 1.5 hrs in the hypocotyl in response to ethylene or shade. Biological process (BP) terms corresponding to enriched GO IDs have been tabulated on the right side.

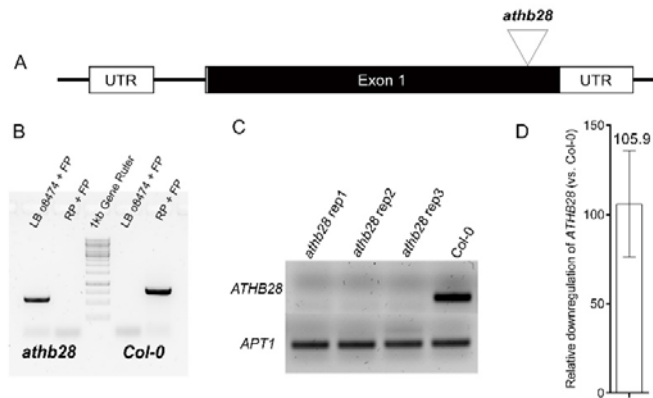

53

54 **Supplemental Figure S3.** Genotyping and transcript level verification. A, T-DNA insertion position in GABI-  
 55 KAT line GK-326G12 (*athb28*) B, Genotyping of *athb28*, (C) and (D) Null transcript and downregulation level  
 56 of ATHB28 in *athb28* (vs. Col-0). Abbreviations: In (B) LP: left primer, RP: right primer, LBo8474: GABI-KAT  
 57 sequencing primer.

58

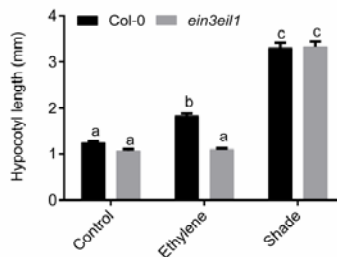

59

60 **Supplemental Figure S4.** Ethylene signalling mutant *ein3eil1* shows hypocotyl elongation response similar to  
 61 wild-type in response to shade but totally lacks elongation in response to ethylene. Hypocotyl length was  
 62 measured following 96 h of ethylene and shade. Mean  $\pm$  S.E. was calculated for 60 seedlings. Different letters  
 63 indicate significant differences from a 2-way ANOVA followed by Tukey's HSD Post-Hoc pairwise comparison.

| Motifs over-represented in TAIR Motif analysis |              |                                     |            |          |                      |
|------------------------------------------------|--------------|-------------------------------------|------------|----------|----------------------|
| Gene set                                       | Top 2 motifs | Relevance                           | % Gene Set | % Genome | p-value              |
| Common Up                                      | CACATG       | HUD type E-box or PBE-box           | 51         | 36       | 3.94e <sup>-22</sup> |
|                                                | TAATTA       | homeodomain binding site            | 72         | 60       | 3.85e <sup>-15</sup> |
| Common Down                                    | CACGTG       | G-box                               | 22         | 15       | 5.62e <sup>-09</sup> |
|                                                | ACGTGG       | ABA-responsive element (ACGTGG/TC). | 28         | 21       | 1.39e <sup>-07</sup> |

64

65

66 **Supplemental Figure S5.** TAIR motif analysis and functional validation of PIFs and MYCs in hypocotyl  
 67 elongation. TAIR motif overrepresentation (Lamesch et al., 2012). Top 2 hexamer motifs are shown for each  
 68 set along with the name of motifs (relevance). % Microarray and % Genome indicate percentage of genes  
 69 with the motif relative to the total number of genes in the gene set and in the genome respectively.  
 70

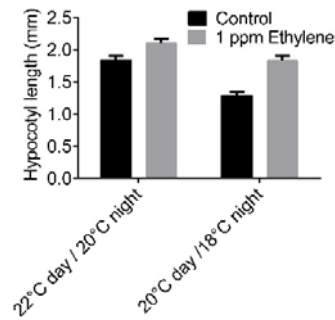

71

72 **Supplemental Figure S6.** Hypocotyl length of Landsberg erecta ecotype of *Arabidopsis thaliana* under  
 73 control and 1  $\mu\text{L}^{-1}$  ethylene conditions when grown at 22°C day / 20°C night and 20°C day / 18°C night  
 74 temperature regime.

75

76

| Photosynthesis category        | Ethylene specific | Common Down  | Shade specific |
|--------------------------------|-------------------|--------------|----------------|
| Light reaction. Photosystem II | <b>53.33</b>      | 20.00        | 1.67           |
| Light reaction. Photosystem I  | <b>62.96</b>      | 7.41         | 3.70           |
| Light reaction. Other bins     | 36.07             | 13.11        | 3.28           |
| Photorespiration               | 22.73             | 45.45        | 4.55           |
| Calvin cycle                   | 28.13             | <b>56.25</b> | 3.13           |

77

78 **Supplemental Table S1.** Proportion of photosynthesis genes in different gene sets from the Venn diagram of  
 79 negative clusters. Numbers in the table denote the % of total Mapman-assigned genes for the different  
 80 photosynthetic processes. Bold numbers indicate top 3 photosynthetic categories.

81

## 82 LITERATURE CITED

83 **J. Reimand, M. Kull, H. Peterson, J. Hansen, J. Vilo (2007).** g:Profiler - a web-based  
 84 toolset for functional profiling of gene lists from large-scale experiments *NAR.* **35:**  
 85 W193-W200

86 **Nagel, A., Thimm, O., Redestig, H., Blaesing, O.E., Steinhauser, D., Gibon, Y.,**  
 87 **Morcuende, R., Weicht, D., Meyer, S., and Stitt, M. (2005).** Extension of the  
 88 Visualization Tool MapMan to Allow Statistical Analysis of Arrays, Display of  
 89 Corresponding Genes, and Comparison with Known Responses. *Plant Physiol.* **138:**  
 90 1195–1204.

91

92

93
